# Supplementary material
Source: ML conference proceedings conference paper supplement (https://openaccess.thecvf.com/content/WACV2023/html/Guirguis_Towards_Discriminative_and_WACV_2023_paper.html)
Supplement: Supplementary file 1 [file Guirguis_Towards_Discriminative_and_WACV_2023_supplemental.pdf]

# [Supplementary] Towards Discriminative and Transferable One-Stage Few-Shot Object Detectors

Karim Guirguis<sup>\*1,2</sup> Mohamed Abdelsamad<sup>\*3</sup> George Eskandar<sup>3</sup> Ahmed Hendawy<sup>3</sup> Matthias Kayser<sup>1</sup>  
Bin Yang<sup>3</sup> Juergen Beyerer<sup>2,4</sup>

Robert Bosch GmbH<sup>1†</sup> Karlsruhe Institute of Technology<sup>2</sup> University of Stuttgart<sup>3</sup> Fraunhofer IOSB<sup>4</sup>

## 1. Implementation Details.

We adopt a ResNet-50 [1] as a backbone and a feature pyramid network (FPN) [2]. For meta-training, we follow the standard training schedule of RetinaNet [3]. We train the model using a stochastic gradient descent (SGD) for 90k iterations with a batch size of 16 and a learning rate of 0.01 decayed twice at 50k and 80k iterations by a factor of 10. Moreover, we use a weight decay of 0.0001 and momentum of 0.9. We meta-train in a 5-way-5-shot manner, setting  $N = 5$  in the proposed MWST algorithm, resulting in a total of 25 shots per task. Horizontal image flipping for the query image is utilized as the only data augmentation technique during meta-training. As for meta-testing, we set the number of iterations to 6000 with a learning rate of 0.005 decayed by a factor of 10 at iteration 4000. Moreover, to exploit the proposed MWST, we set  $N = 15$ . All experiments are conducted using 4 Nvidia Tesla V100 GPUs.

## 2. Ablation study

### 2.1. Effect of Focal Loss Parameters

In Table 1, we analyze the effect of the focal loss hyperparameters during the meta-training phase. We show the results for 4 different settings of the  $\alpha$  and  $\gamma$  hyperparameters. Using the default parameters of RetinaNet leads to divergence during the training. Higher values for  $\alpha$  and  $\gamma$  are needed because there are fewer positive anchors in FSOD than the general OD task due to the smaller number of bounding boxes in the query image. This problem has been partially alleviated by the MWST but is found to be further alleviated by tuning the focal loss.

### 2.2. Effect of the Number of Anchors

In Table 2, the performance of our meta-detector for different number of anchors trained only using  $L_{loc}$  and  $L_{cls}$  (without  $L_{margin}$ ) is shown. The results highlight the importance of the anchor density for meta-detectors. Although the number and size of anchors have always played an important role in dense object detectors [3], their effect be-

Table 1: **Effect of FL hyperparameters.** We can see that our model is sensitive to the hyperparameters of the focal loss. This sensitivity is a problem faced by all meta-learners.

| FL Parameters |          | Base Performance                      |             |             |             | Novel Performance |             |             |             |
|---------------|----------|---------------------------------------|-------------|-------------|-------------|-------------------|-------------|-------------|-------------|
| $\gamma$      | $\alpha$ | bAP                                   | bAP50       | bAP75       | bAR         | nAP               | nAP50       | nAP75       | nAR         |
| 2             | 0.25     | no convergence (training instability) |             |             |             |                   |             |             |             |
| 2             | 0.5      |                                       |             |             |             |                   |             |             |             |
| 4             | 0.25     | 24.3                                  | 38.0        | 26.4        | 40.6        | 12.6              | 23.0        | 12.3        | 30.8        |
| 4             | 0.5      | <b>32.5</b>                           | <b>48.6</b> | <b>35.0</b> | <b>54.0</b> | <b>15.8</b>       | <b>26.4</b> | <b>15.9</b> | <b>36.0</b> |

Table 2: **Effect of number of anchors.** Initially, Increasing the number of anchors leads to performance increase, however, it leads to training instability if learning capacity is not increased.

| #Sizes | #Ratios | Base Performance                      |             |             |             | Novel Performance |             |             |             |
|--------|---------|---------------------------------------|-------------|-------------|-------------|-------------------|-------------|-------------|-------------|
|        |         | bAP                                   | bAP50       | bAP75       | bAR         | nAP               | nAP50       | nAP75       | nAR         |
| 1      | 1       | 17.7                                  | 27.8        | 19.1        | 40.0        | 7.6               | 13.8        | 7.6         | 24.0        |
| 3      | 3       | 27.5                                  | 40.5        | 29.8        | 46.6        | 13.0              | 22.0        | 13.0        | 29.6        |
| 5      | 3       | <b>32.5</b>                           | <b>48.6</b> | <b>35.0</b> | <b>54.0</b> | <b>15.8</b>       | <b>26.4</b> | <b>15.9</b> | <b>36.0</b> |
| 5      | 5       | no convergence (training instability) |             |             |             |                   |             |             |             |
| 7      | 7       |                                       |             |             |             |                   |             |             |             |

comes more pronounced in FSOD. In our design, we find that by increasing the number of the anchors, the base and novel performance improve. We argue that a greater number of anchors provides a stronger learning signal to the post-fusion network, refining the instance-level features. We notice that the training becomes unstable when increasing the number of anchors beyond 15, arguably because the model capacity becomes smaller for the task.

## 3. Qualitative Results

In Figure 1, we present different success and failure cases of our proposed FSRN model in a 10-shot setting on MS-COCO dataset.

<sup>\*</sup>Both authors have contributed equally to this work

<sup>†</sup>karim.guirguis@de.bosch.com

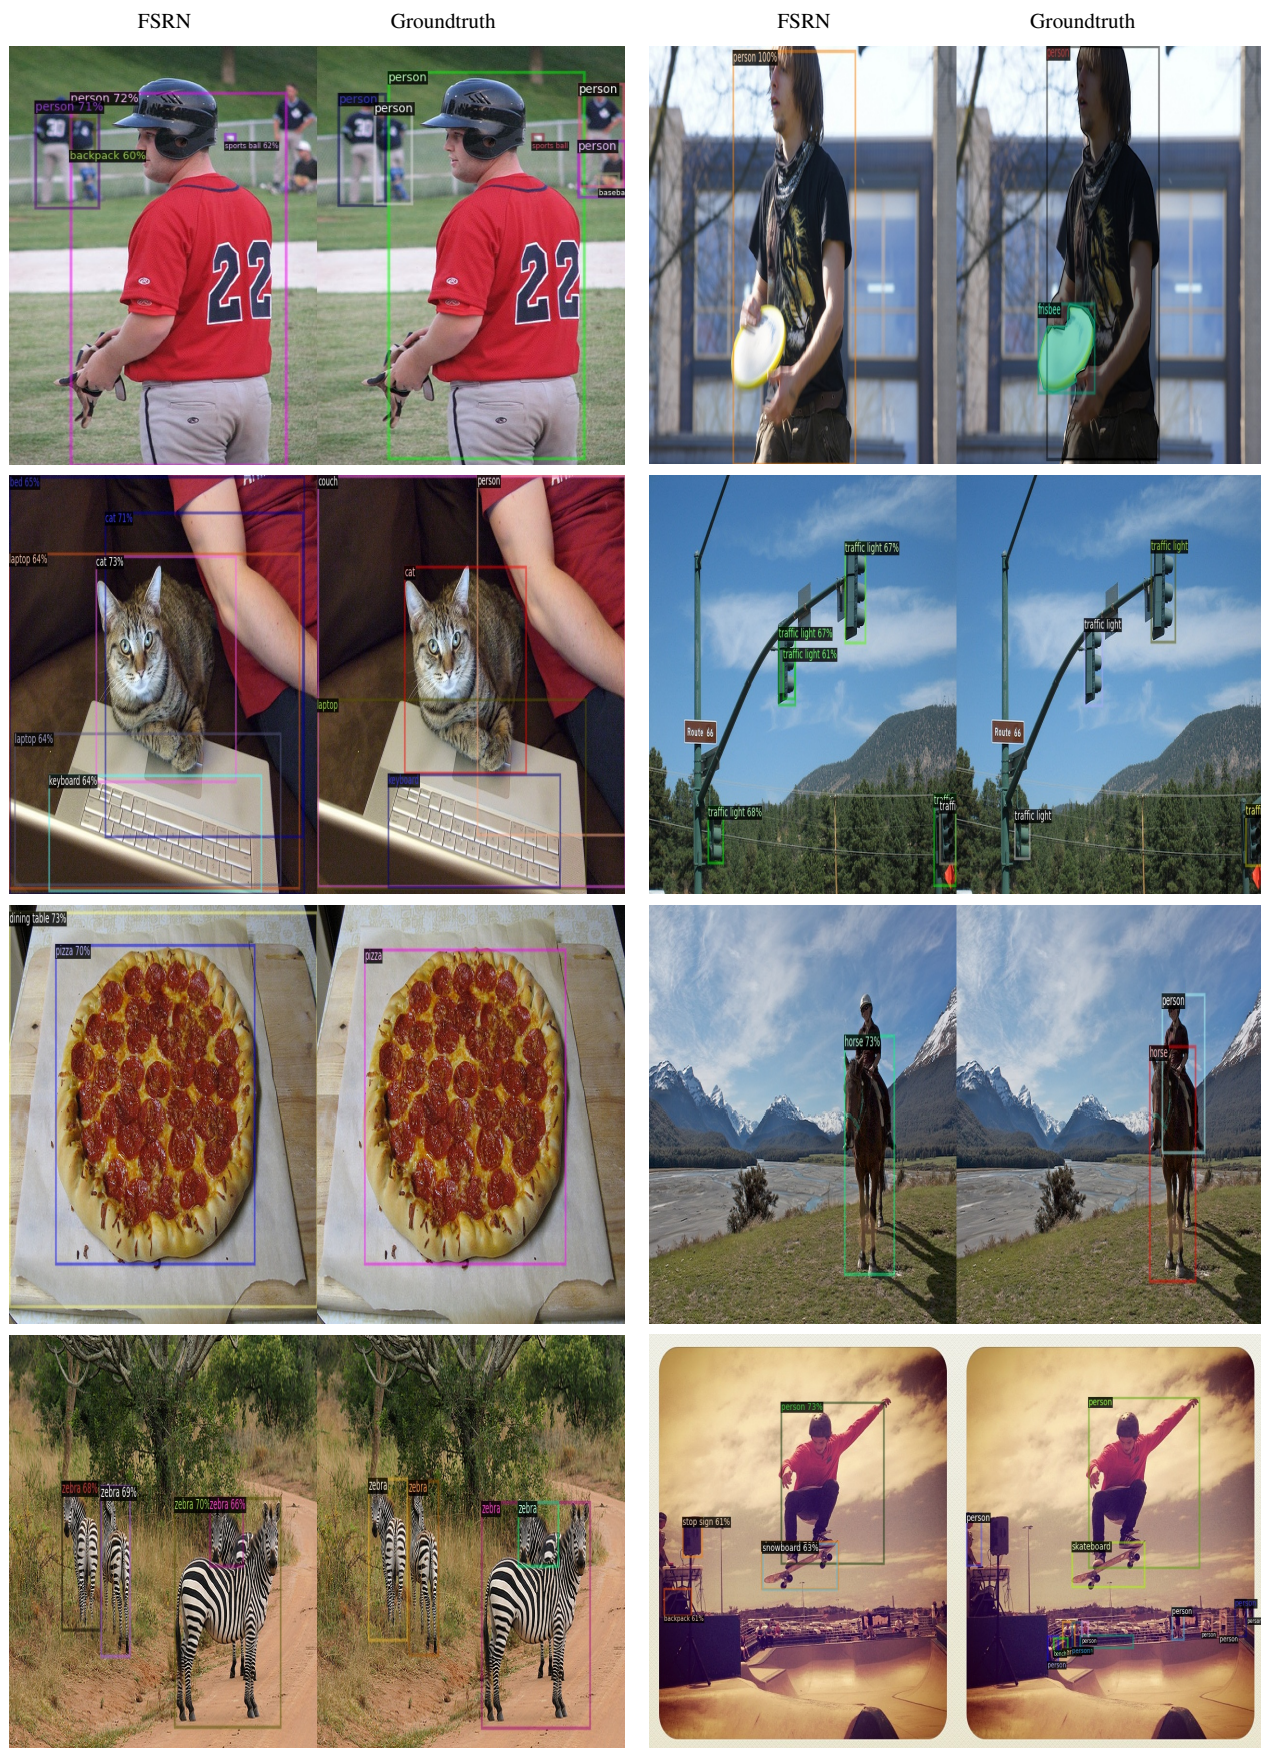

Figure 1: Qualitative results for the proposed FSRN model in 10-shot setting on MS-COCO dataset.

## References

- [1] Kaiming He, Xiangyu Zhang, Shaoqing Ren, and Jian Sun. Deep residual learning for image recognition. In *IEEE Conference on Computer Vision and Pattern Recognition*, pages 770–778, 2016.
- [2] Tsung-Yi Lin, Piotr Dollár, Ross Girshick, Kaiming He, Bharath Hariharan, and Serge Belongie. Feature pyramid networks for object detection. In *IEEE Conference on Computer Vision and Pattern Recognition*, pages 2117–2125, 2017.
- [3] Tsung-Yi Lin, Priyal Goyal, Ross Girshick, Kaiming He, and Piotr Dollar. Focal loss for dense object detection. *IEEE Transactions on Pattern Analysis and Machine Intelligence*, 42(2):318–327, 2018.
